# Supplementary material
Source: publisher site journal article supplement (https://www.dovepress.com/article/589957)
Supplement: Supplementary file 1 [file 589957.pdf]

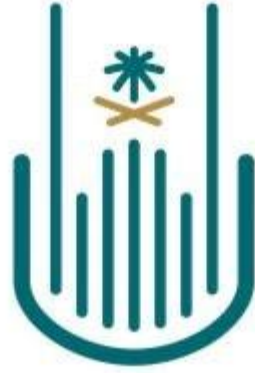

جامعة أم القرى  
UMM AL-QURA UNIVERSITY

# Midwifery Research Priorities in Saudi Arabia: A Priority-Setting Partnership Approach

**Dr. Nawal Abdulghani**

**4280288**

Assistant Professor in Midwifery, Faculty of Nursing

BSN Nursing (Saudi Arabia), Master of Clinical Midwifery (Australia),

PhD (Australia)

Umm Al-Qura University

## Interview Questions

### Project Title:

## Midwifery Research Priorities in Saudi Arabia: A Priority-Setting Partnership Approach

---

### Research aim

The study aims to determine midwifery research priorities for healthcare services in Saudi Arabia using a priority-setting partnership approach.

Partnering with consumers and clinicians in the research process can help identify priorities that are of direct relevance to health service for children, mothers, reproductive communities and midwives.

### Research Questions:

To address the study aim, the following questions should be addressed:

1. What are the key gaps in midwifery practices in Saudi Arabia that require further research to improve service delivery?
2. What are the key gaps in midwifery education in Saudi Arabia that require further research to improve to graduate competence?
3. What research is needed to enhance culturally competent practices midwifery care in Saudi Arabia?
4. Which specific maternal health outcomes in Saudi Arabia necessitate urgent midwifery research to reduce morbidity and mortality rates?

### Ethical Considerations

The study adhered to ethical principles of Umm Al-Qura University, including informed consent, participants information statements, confidentiality, and the right to withdraw.

Ethical approval was obtained from UQU Ethical Committee Boards. Approval No. (HAPO-02-K-012-2025-06-2849).

## Interview Questions

### Section 1: Background and Experience

- 1- Can you describe your current role and experience in maternal and neonatal care?
- 2- How long have you been working in the field of midwifery or related healthcare services?
- 3- What types of healthcare settings have you worked in (e.g., hospitals, clinics, community health centres, Universities)?

### Section 2: Identifying Gaps and Needs

- 4- In your opinion, what are the most pressing challenges currently faced in midwifery practice in Saudi Arabia?
- 5- Are there specific areas in maternal or neonatal care where you feel more research is urgently needed?
- 6- What gaps do you see in current midwifery education?
- 7- What gaps do you see in current midwifery scope of practice, training and clinical practice?
- 8- What gaps do you see in current midwifery profession and professional development?
- 9- How can technology and AI assist in midwifery practice, education and research?

### Section 3: Cultural and Contextual Considerations

- 10- How do cultural beliefs and practices influence midwifery care in your experience?
- 11- What research do you think is needed to improve culturally competent midwifery care in Saudi Arabia?

### Section 4: Outcomes and Impact

- 12- Which maternal or neonatal health outcomes do you believe require immediate research attention to reduce morbidity and mortality?
- 13- Are there any specific populations (e.g., rural women, adolescents, high-risk pregnancies) that you think should be prioritized in midwifery research?

### Section 5: Research Prioritization

- 14- If you could choose five topics for midwifery research that would have the greatest impact on healthcare delivery, what would they be?

15- How would you rank the importance of the areas for the research you suggested?

### **Section 6: Stakeholder Engagement**

16- How do you think patients and families should be involved in setting research priorities?

17- What strategies do you suggest to ensure that research findings are translated into practice?

### **Section 7: Final Thoughts**

18- Is there anything else you would like to add about midwifery research needs in Saudi Arabia?

---

### **Contact Information**

For questions or further information, please contact:

Dr. Nawal Abdulghani

Email: [nabdulghani@uqu.edu.sa](mailto:nabdulghani@uqu.edu.sa)

Phone: +966503837538

---
